1 ***Performances of bioinformatics tools for the analysis of sequencing data of Mycobacterium***  
2 ***tuberculosis complex strains***

3  
4 Pauline Quagliaro<sup>1</sup>, Samira Dziri<sup>2</sup>, Fatma Magdoud El Alaoui<sup>2</sup>, Patrick Saint Louis<sup>2</sup>, Loïc de  
5 Pontual<sup>1</sup>, Julie Marin<sup>3</sup>, Etienne Carbonnelle<sup>2,3</sup>, Typhaine Billard-Pomares<sup>2,3</sup>

6  
7 <sup>1</sup> APHP, HUPSSD, Hôpital Jean Verdier, Service de Pédiatrie, 93140, Bondy, France.

8 <sup>2</sup> APHP, HUPSSD, Hôpital Avicenne, Service de Microbiologie Clinique, 93000, Bobigny,  
9 France.

10 <sup>3</sup> Université Sorbonne Paris Nord and Université Paris Cité, Inserm, IAME, F-93000 Bobigny,  
11 France.

12  
13 Keywords: *Mycobacterium tuberculosis*, whole-genome sequencing, bioinformatics tools,  
14 phylogeny

15  
16 **Abstract**

17 Whole genome sequencing of *Mycobacterium tuberculosis complex* (MTBC) strains is a new  
18 and rapidly growing tool to obtain results regarding resistance, virulence factors and  
19 phylogeny of the strains. Bioinformatics tools presented as user-friendly and easy to use are  
20 available online. The objective of this work was to evaluate the performances of two  
21 bioinformatics tools, easily accessible on the internet, for the analysis of sequencing data of  
22 MTBC strains.

23 Two hundred and twenty-seven MTBC strains isolated at the laboratory of the Avicenne  
24 Hospital between 2015 and 2021 were sequenced using Illumina<sup>®</sup>(USA) MiSeq technology. An  
25 analysis of the sequencing data was performed using the two tools Mykrobe and PhyResSE.  
26 Sequencing quality, resistance or susceptibility status and phylogeny were investigated for  
27 each strain. Genotypic resistance results were compared to the results obtained by  
28 phenotypic drug susceptibility testing performed in the hospital's routine laboratory.

29 Using the PhyResSE tool we found an average coverage of 98% against the reference strain  
30 H37Rv and an average depth of 119X. No information on sequencing quality was obtained  
31 with the Mykrobe tool. The concordance of each tool with the phenotypic method for

32 determining susceptibility to first-line anti-tuberculosis drugs was 95%. Mykrobe and  
33 PhyResSE tools identified resistance to second-line anti-tuberculosis drugs in 5.3% and 5.7%  
34 of cases respectively. The sensitivity and specificity of each tool compared to the phenotypic  
35 method was respectively 70% and 98% for Mykrobe and 76% and 97% for PhyResSE. Finally,  
36 the two tools showed 99.5% agreement in lineage determination.

37 The Mykrobe and PhyResSE bioinformatics tools were easy to use, fast and efficient. The  
38 Mykrobe tool had the advantage of being offline and its interface was more user-friendly. The  
39 use of these platforms depends on their accessibility and updating. However, their use is  
40 accessible to people not trained in bioinformatics and would allow a complementary approach  
41 to phenotypic methods for the study of MTBC strains.

42

### 43 1. Introduction

44

45 Tuberculosis (TB) is an infectious disease caused by the bacterium *Mycobacterium tuberculosis*  
46 (*Mtb*). The global population structure of *M. tuberculosis* isolates is classified into seven major  
47 lineages, each associated with specific human populations including the Indo-Oceanic  
48 (Lineage 1), the East Asian (Lineage 2), the East-African-Indian (Lineage 3), the Euro-American  
49 (Lineage 4), the West African-1 (Lineage 5), the West African-2 (Lineage 6) the Ethiopian  
50 (Lineage 7) distinct from the *M. bovis* clade (1). The transmission occurs between individuals  
51 by dispersion of aerosols, from a contagious patient called bacilliferous (2). Worldwide, TB  
52 remains one of the most prevalent infectious diseases and becomes the first leading infectious  
53 disease killer (3). Approximately a quarter of the world's human population has latent TB  
54 infection and is at risk of developing TB disease, providing a reservoir of TB for decades (4).  
55 The World Health Organization (WHO) estimated 10 million new cases of active TB in 2019 (5).  
56 Treatment of TB is based on the four major anti-TB drugs: isoniazid (INH), rifampicin (RMP),  
57 ethambutol (EMB), and pyrazinamide (PZA). Short courses of treatment lasting 6 months use  
58 the four anti-TB drugs in combination for 2 months, followed by INH and RMP for 4 months  
59 (6,7). The emergence of antibiotic resistance in TB strains is a global phenomenon that  
60 threatens the WHO's goal of eradicating TB by 2035 (5). Multidrug-resistant (MDR) strains are  
61 defined as resistant to the first-line antibiotics INH and RMP. This resistance is of concern  
62 because it significantly increases the risk of treatment failure. Additional resistance to

63 fluoroquinolones (FQ) and at least one additional Group A drug (levofloxacin or moxifloxacin,  
64 bedaquiline and linezolid) defines extensively Drug Resistance (XDR)(8). The management of  
65 patients infected by MDR or XDR strains remain actually long and complex, particularly  
66 because of the limited choice of second-line anti- TB drugs (3).

67 Several methods can be used to detect TB drug resistance. The phenotypic method in solid  
68 medium remains the reference method, but it takes at least 3 weeks to obtain results, which  
69 leads to a delay in the adaptation of anti-TB treatments (9). The phenotypic method in liquid  
70 medium allows to obtain a result more quickly, around 14 days. To reduce this delay,  
71 genotyping techniques have been developed, that provide results in a few hours. The use of  
72 rapid molecular diagnostic tests based on PCR (Polymerase Chain Reaction) method, such as  
73 the Xpert® MTB/RIF assay (Cepheid®)(10) and GenoType MTBDRplus (Hain Lifescience®)(11),  
74 have been recommended by the WHO since 2008. These molecular methods make it possible  
75 to identify mutations in the target genes of the main anti- TB drugs: the *rpoB* gene involved in  
76 rifampicin resistance and the *inhA* and *katG* genes involved in isoniazid resistance for the  
77 GenoType MTBDRplus test (Hain Lifescience®)(12). However, these techniques are limited by  
78 the number of mutations they can detect (13,14).

79 The advent of whole genome sequencing (WGS) techniques provides a new approach to the  
80 study of *M. tuberculosis complex* (MTBC) strains and plays now a leading role in epidemiologic  
81 studies of TB. The complete genome sequence of the *M. tuberculosis* reference strain H37Rv  
82 was described in 1998 (15). The genome is approximately 4.41 million base pairs in length and  
83 encoded approximately 4000 genes. Using WGS, it is possible to detect resistances that escape  
84 molecular techniques. According to recent studies, WGS allows to obtain TB drug resistance  
85 profiles on average 9 days earlier than phenotypic tests for first-line anti-TB drugs (16,17).  
86 Moreover, WGS not only allows the study of known resistance genes but also the  
87 characterization of other loci as predictive of resistance or not (18). Finally, the WGS allows to  
88 determine the lineage of each strain and thus to better study the circulation of strains  
89 throughout the world.

90 World health organization considers NGS (Next Generation Sequencing) as “invaluable” to  
91 guide diagnosis and treatment, but also for early detection of MDR or XDR *M. tuberculosis*  
92 outbreaks (19). Accordingly, several software packages have recently been developed to assist  
93 in the analysis of NGS generated sequences. (20–24). They work by detecting pre-defined

94 mutations, mostly single-nucleotide polymorphisms (SNPs), from the reads (sequences of DNA  
95 fragments read by the sequencer) or an assembled genome and call the strain resistant  
96 whenever one of these mutations is detected. The performances of these software vary from  
97 one study to another and according to the tool used. To our knowledge, these softwares are  
98 not usually used in routine laboratory in France. The objective of this work was to evaluate  
99 the performances of two bioinformatics tools, Mykrobe and PhyResSE, for the determination  
100 of resistance and the identification of the lineage of MTBC sequenced strains.

101

## 102 2. Material and methods

103

104 ***Culture and identification of MTBC.*** Clinical MTBC strains were randomly taken from patients  
105 during routine care at Avicenne Hospital to represent clinical French epidemiology of TB. This  
106 was a retrospective study and the strains included were all stocked strains. Strains were  
107 isolated using Coletsos media (BioRad®, Marnes-la-Coquette, France). Identification of MTBC  
108 was performed using Biline TB Ag MPT64 Rapid test (Abbott®, Chicago, United States) and  
109 confirmed after extracting the DNA by using GenoType Hain technology (Biocentric®, France).

110

111 ***Phenotypic testing.*** Phenotypic DST was determined for the four first-line drugs using  
112 BACTEC™ Mycobacterial Growth Indicator Tube™ (MGIT) 960 (Becton Dickinson®, Sparks, MD,  
113 USA) liquid culture system according to the manufacturers' instructions, at the following  
114 critical concentrations: RMP, 1.0 mg/L; INH, 0.1 mg/L; PZA, 100.0 mg/L; EMB, 5.0 mg/L.  
115 According to the laboratory's routine protocol, all results showing phenotypic resistance for  
116 MTBC isolates were verified in a second experiment. The phenotypic DST was classically used  
117 as the gold standard to calculate sensitivity (prediction of antibiotic resistance), specificity  
118 (prediction of antibiotic susceptibility), negative predictive value (NPV) and positive predictive  
119 value (PPV) of bioinformatic tools.

120

121 ***Whole genome sequencing.*** Genomic DNA was extracted from colonies growing on Coletsos  
122 media. Denaturation and DNA extraction from the MTBC strains were performed as previously  
123 described (25). DNA quantity was assessed using the Qubit 2.0 fluorometer (Thermo Fisher

124 Scientific<sup>®</sup>, USA). WGS was performed with Illumina<sup>®</sup> Technology (MiSeq) using the Nextera  
125 XT DNA library preparation kits as instructed by the manufacturer (Illumina<sup>®</sup>, San Diego, USA).

126

127 **Bio informatic tools.** Two bioinformatics tools were evaluated in this study.

128 The Phylo-Resistance Search Engine (PhyResSE) (<http://PhyResSE.org>)(21) is a German online  
129 tool for processing MTBC-related bioinformatics data. It has been available for use since 2015  
130 and provides the following information: total number of sequences, percentage in GC, Phred  
131 score, depth and coverage to the reference strain H37Rv. The number of variants compared  
132 to the reference strain, the lineage and the mutations conferring antibiotic resistance were  
133 also obtained with this tool. The resistance for first line antibiotics (Isoniazid, Rifampicin,  
134 Pyrazinamide, Ethambutol) and second line antibiotics (Streptomycin, Fluoroquinolone,  
135 Kanamycin, Capreomycin, Ethionamide) are detected (26). PhyResSE has compiled a catalog  
136 of resistance conferring mutations from the literature and their own laboratory data. For each  
137 mutation, a probability of finding the mutation on the liquid antibiotic susceptibility test is  
138 given as well as a link to the scientific article highlighting the effect of this mutation. These  
139 data are regularly updated. The website is accessible through a standard search engine. A  
140 private and secure session is accessed using a 32-character key.

141 The Mykrobe application (<http://mykrobe.com>)(27) is an English offline application for  
142 processing Mtb-related bioinformatics data. It is available for use since 2019. The information  
143 obtained using Mykrobe is the presence of a resistance conferring mutation with its depth and  
144 the lineage of the strain. The resistance for first line antibiotics (Isoniazid, Rifampicin,  
145 Pyrazinamide, Ethambutol) and second line antibiotics (Streptomycin, Fluoroquinolone,  
146 Kanamycin, Capreomycin) are detected (26). No information on the quality of the sequencing  
147 is given. The application is accessible on the Internet using a standard search engine and can  
148 be easily downloaded.

149

150 **Ethics statement and patient population.** This retrospective study was approved by the Local  
151 Ethics Committee for Clinical Research of the Paris Seine-Saint-Denis University Hospitals  
152 under no. CLEA-2021-185.

153

154 3. **Results**

155 **Sequencing quality results.** Two hundred and fifty-seven clinical MTBC strains taken from  
156 patients randomly selected during routine care at Avicenne Hospital between 2015 and 2021  
157 were sequenced. Thirty strains were excluded due to a poor quality of sequencing results:  
158 read depth at a position less than 20X.

159 In total, 227 strains were available for analysis, isolated from 221 patients. Sequencing quality  
160 results obtained using the PhyResSE tool showed a high average coverage of 98% against the  
161 H37Rv reference strain and an average depth of 119X. These data are not specified with  
162 Mykrobe tool.

163

164 **Comparison of WGS and phenotypic DST results.** By DST, as described in Table 1, resistance  
165 to INH, RMP, EMB and PZA were 7.9%, 2.2%, 0.45% and 5.2% respectively. A total of 30 strains  
166 (13.2%) showed resistance to at least one of the first-line anti-TB drugs. Four strains (1.7%)  
167 were MDR. Regarding analysis by WGS, firstly using PhyResSE tool, we found 15 strains with a  
168 resistance to INH (6.6%), 5 to RMP (2.2%), 3 to EMB (1.3%), 11 to PZA (4.8%). Globally,  
169 resistance to at least one of the first-line anti-TB drugs was found for 20 strains (8.8%).  
170 Discrepancies between DST and PhyResSE were found for 12 strains (5.3%) detailed in Table  
171 2. Concerning the 5 (2.2%) strains found resistant by WGS but susceptible by DST, the  
172 mutations found concerned the *embA* gene (*D4N*) for one strain, the *embB* gene (*G406A*) for  
173 one strain and the *pncA* gene (*T87M*) for 3 strains. Concerning the 7 (3%) strains found  
174 resistant by DST but susceptible by WGS, 3 strains were resistant to INH and 4 to PZA (Table  
175 2). Secondly, using Mykrobe tool, we found 15 strains with a resistance to INH (6.6%), 6 to  
176 RMP (2.6%), 2 to EMB (0.8%), 8 to PZA (3.5%). Resistance to at least one of the first-line anti-  
177 TB drugs was found for 23 strains (10%). Discrepancies between phenotypic and genotypic  
178 methods were found for 11 strains (4.8%) for Mykrobe, detailed in Table 3. Concerning the 3  
179 (1.3%) strains found resistant by WGS but susceptible by DST, the mutations found concerned  
180 the *rpoB* gene (*D545E*) for 2 strains and the *embB* gene (*G406A*) for one strain. For the 8 (3.5%)  
181 strains found resistant by DST but susceptible by WGS, one was resistant to RIF, 3 to INH and  
182 4 to PZA (Table 3). The global concordance of each tool in comparison with the phenotypic  
183 DST method for determining susceptibility to first-line anti-TB drugs was 95%. The sensitivity  
184 and specificity of each tool, for the first anti-TB drugs compared to the phenotypic DST method  
185 was 70% and 98% for Mykrobe and 76% and 97% for PhyResSE (Table 1). Regarding resistance

186 to second-line drugs, 5.3% resistance rate was detected with Mykrobe as fluoroquinolone  
187 resistance was detected in 5 strains (*gyrA* gene) and streptomycin resistance was detected in  
188 8 strains (*rpsL* in 7 strains and *rrs* in 1 strains). A resistance rate to second-line drugs of 5.7%  
189 was obtained using the PhyResSE tool. More precisely, fluoroquinolone resistance was  
190 detected in 5 strains (*gyrA* gene), capreomycin resistance was detected in one strain (*tylA*  
191 gene) and streptomycin resistance was detected in 8 strains (*rpsL* in 4 strains and *rrs* in 4  
192 strains).

193 **Lineage determination.** All the main lineages described, as the exception of the lineage 7,  
194 were represented in our dataset (Table 4). For the two tools, Lineage 4 was the most common  
195 lineage, followed by lineage 3 and 1. The two tools showed 99.5% agreement in lineage  
196 determination. Only one discrepancy was found as a strain belonging to the Euro-American  
197 lineage was identified by PhyResSE while Mykrobe identified this strain belonging to the East  
198 African Indian lineage (Table 4).

199

#### 200 4. **Discussion**

201 In this study, we evaluated the performances of two bioinformatics tools, Mykrobe and  
202 PhyResSE, for the analysis of sequencing data and found high performances for the two  
203 bioinformatics tools as the sensitivity and specificity compared to the phenotypic method was  
204 70% and 98% for Mykrobe and 76% and 97% for PhyResSE, as described in other studies  
205 comparing these bioinformatics tools (26,28,29). We have chosen to study these two  
206 bioinformatics tools among others (TBprofiler, MTBseq, TGS-TBcar for example) because they  
207 are the easiest to access, i.e. usable with a standard computer on a standard search engine  
208 without any particular information skills or need to download or master other software. The  
209 two tools are easy to use and accessible to people not trained in bioinformatics. Given the  
210 facility of use, we can imagine training laboratory technicians to their use when setting up  
211 routine sequencing of MTBC strains.

212 Regarding the handling of each tool, we appreciated the possibility to obtain sequencing  
213 information quality offered by PhyResSE. Another advantage of the PhyResSE tool was the  
214 obtention of a bibliographic reference concerning the mutation conferring a resistance when  
215 one was identified. Nevertheless, the PhyResSE tool had some disadvantages. Firstly, the  
216 number of SNPs difference between each strain was not available. Secondly, the interface was



217 not so user-friendly as expected in terms of presentation and ease of finding key information.  
218 The use of PhyResSE was online, which can be limiting in some work situations and the  
219 sequences (fastq files) must be uploaded on the website which was time consuming. Lastly,  
220 the uploaded sequences can be used by the designers of the bioinformatics tool.  
221 Regarding the Mykrobe tool, we appreciated the simplicity of access to the application *via* the  
222 internet as well as its being easy to use. The presentation of the results was very clear as only  
223 the essential information was given. This application was usable to all the staff of the  
224 laboratory as well as to the clinician. We also appreciated the fact that the application can be  
225 used offline once installed on the computer. It was also possible to save the results, which  
226 allows to make verifications further when needed. Contrary to PhyResSE, MTBC sequences  
227 were not shared with designers when using the tool. The Mykrobe tool had some  
228 disadvantages: firstly, the main disadvantage was that the Mykrobe tool gave no information  
229 about the quality of sequencing in terms of coverage and depth. However, the depth was  
230 given if a mutation was detected. It is also a pity not to be able to make a phylogenetic tree  
231 with the studied strains. The developers of Mykrobe are trying to improve their application  
232 and are working on a new version, named “Mykrobe Atlas”, which would allow for real-time  
233 monitoring of global TB (30). The benefits would be to compare a patient's bacterial DNA to  
234 all the TBs in the world and to conclude to a local outbreak or the identification of a strain that  
235 was recently seen in another country or city. Until recently, it was inconceivable to work at  
236 this scale (31).

237 The advantage of WGS is that it represents an “all-in-one” tool that help to investigate TB  
238 transmission but also to address the question of drug susceptibility (20). Regarding drug  
239 susceptibility, we observed a discordance between DST and WGS results for 12 strains with  
240 the PhyResSE tool (5.3%) and 11 strains with the Mykrobe tool (4.8%). The overall agreement  
241 between DST and WGS was 98.7% for the PhyResSE tool and 98.8% for the Mykrobe tool which  
242 is in accordance with other studies (32). The discrepancies observed in our study between  
243 phenotypical results and genomic results concerned the four first-line anti-TB drugs. Several  
244 large-scale sequencing studies have evaluated the correlation between SNP (single nucleotide  
245 polymorphism) identification during sequencing and phenotypically demonstrated resistance,  
246 calculating the predictive sensitivities and specificities of each SNP. According to Quan et al.,  
247 the sensitivity of NGS is estimated at 94.2% and the specificity at 99.4% for an overall



248 concordance of 99.2% for first-line anti-TB drugs (33). The discrepancies between the  
249 phenotypic and genotypic methods may depend on the regular updating of the databases  
250 used by the two tools according to the progress of knowledge. Due to its cost and  
251 performances, WGS is for now insufficient to support the use of WGS as an alternative to  
252 conventional phenotype-based DST. It should be implemented in specific cases to detect  
253 resistance rapidly in particular for the clinical management of MDR-TB strains, providing  
254 considerable information when compared with current routine methods.

255 The phenotypic study to second line anti-TB drugs is not performed easily in routine  
256 laboratories and is performed in majority by specialized laboratories. Contrary to standard  
257 phenotypic tests conducted in hospital laboratories, WGS offers the opportunity to determine  
258 resistance to second-line anti-TB drugs easily. The detection of an antibiotic resistance to  
259 second-line anti-TB drugs by the two bioinformatics tools is an important progress especially  
260 in the case of MDR or XDR-TB strain . Indeed, the obtention of results from phenotypic DST  
261 takes a long time and delays the adaptation of the antibiotic therapy for the patient. We found  
262 that 5.7% and 5.3% of strains were resistant to second line anti-TB drugs using PhyResSE and  
263 Mykrobe respectively. In accordance with other studies (16,17) if the WGS of MTBC was  
264 routinely implemented, the delay to get results would probably be shortened to about a week,  
265 that would be interesting in the case of a MDR or XDR-TB strains to quickly adapt anti-TB  
266 treatment. Unfortunately, the use of WGS represents a non-negligible cost in terms of human  
267 and financial resources, which can be an obstacle to its implementation in the laboratory.

268

## 269 **5. Conclusion**

270 WGS is a promising and nowadays indispensable method for the study of MTBC strains. The  
271 bioinformatics tools Mykrobe and PhyResSE were easy to use, fast and efficient. The Mykrobe  
272 tool had the advantage of being offline and its interface was more user-friendly while  
273 PhyResSe indicated sequencing information quality. The use of these platforms depends on  
274 their accessibility and update. They give access to the study of MTBC sequences to personnel  
275 not trained in bioinformatics and could be useful tools for the implementation of this  
276 technique in the laboratory. The discrepancies between phenotype and genotype observed in  
277 our study regarding antibiotic resistance remain too important to completely replace the  
278 phenotypic DST method. WGS coupled with bioinformatics tools would allow a

279 complementary approach to standard methods for the study of MTBC strains, especially for  
280 MDR and XDR TB strains.

281

282 **Acknowledgments:**

283 We would like to thank the Molecular Biology and Data Processing Platform of the  
284 “Université Sorbonne Paris Nord” and the Federative Institute For Biomedical Research  
285 (IFRB) of the “Université Sorbonne Paris Nord”.

286 **REFERENCES:**

287

288 1. Gagneux S, DeRiemer K, Van T, Kato-Maeda M, de Jong BC, Narayanan S, et al. Variable  
289 host-pathogen compatibility in *Mycobacterium tuberculosis*. Proceedings of the  
290 National Academy of Sciences. 21 févr 2006;103(8):2869-73.

291 2. Zumla A, Raviglione M, Hafner R, Fordham von Reyn C. Tuberculosis. N Engl J Med. 21  
292 févr 2013;368(8):745-55.

293 3. Furin J, Cox H, Pai M. *tuberculosis*. The Lancet. avr 2019;393(10181):1642-56.

294 4. Houben RMGJ, Dodd PJ. The Global Burden of Latent Tuberculosis Infection: A Re-  
295 estimation Using Mathematical Modelling. PLoS Med. 25 oct 2016;13(10):e1002152.

296 5. World Health Organization. Global Tuberculosis Report 2020 [Internet]. 2020 [cité 29  
297 mars 2022]. Disponible sur: [https://www.who.int/teams/control-of-neglected-tropical-](https://www.who.int/teams/control-of-neglected-tropical-diseases/lymphatic-filariasis/morbidity-management-and-disability-prevention/global-tuberculosis-programme)  
298 [diseases/lymphatic-filariasis/morbidity-management-and-disability-prevention/global-](https://www.who.int/teams/control-of-neglected-tropical-diseases/lymphatic-filariasis/morbidity-management-and-disability-prevention/global-tuberculosis-programme)  
299 [tuberculosis-programme](https://www.who.int/teams/control-of-neglected-tropical-diseases/lymphatic-filariasis/morbidity-management-and-disability-prevention/global-tuberculosis-programme)

300 6. WHO treatment guidelines for isoniazid-resistant tuberculosis: Supplement to the WHO  
301 treatment guidelines for drug-resistant tuberculosis [Internet]. Geneva: World Health  
302 Organization; 2018 [cité 29 mars 2022]. (WHO Guidelines Approved by the Guidelines  
303 Review Committee). Disponible sur: <http://www.ncbi.nlm.nih.gov/books/NBK531412/>

304 7. Weyer K, Falzon D, Jaramillo E. Towards all-oral and shorter treatment regimens for  
305 drug-resistant tuberculosis. Bulletin of the World Health Organization. 1 oct  
306 2018;96(10):667-667A.

307 8. World Health Organization. Meeting report of the WHO expert consultation on the  
308 definition of extensively drug-resistant tuberculosis, 27-29 October 2020 [Internet].  
309 Geneva: World Health Organization; 2021 [cité 5 avr 2022]. 33 p. Disponible sur:  
310 <https://apps.who.int/iris/handle/10665/338776>

311 9. Canetti G, Rist N, Grosset J. [Measurement of sensitivity of the tuberculous bacillus to  
312 antibacillary drugs by the method of proportions. Methodology, resistance criteria,  
313 results and interpretation]. Rev Tuberc Pneumol (Paris). mars 1963;27:217-72.

314 10. Steingart KR, Schiller I, Horne DJ, Pai M, Boehme CC, Dendukuri N. Xpert® MTB/RIF  
315 assay for pulmonary tuberculosis and rifampicin resistance in adults. Cochrane  
316 Database of Systematic Reviews. 2014;

317 11. Hillemann D, Rusch-Gerdes S, Richter E. Evaluation of the GenoType MTBDRplus Assay  
318 for Rifampin and Isoniazid Susceptibility Testing of *Mycobacterium tuberculosis* Strains  
319 and Clinical Specimens. Journal of Clinical Microbiology. 1 août 2007;45(8):2635-40.

320 12. Jagielski T, Minias A, van Ingen J, Rastogi N, Brzostek A, Żaczek A, et al. Methodological  
321 and Clinical Aspects of the Molecular Epidemiology of *Mycobacterium tuberculosis* and  
322 Other Mycobacteria. Clin Microbiol Rev. avr 2016;29(2):239-90.

- 323 13. Lange C, Chesov D, Heyckendorf J, Leung CC, Udawadia Z, Dheda K. Drug-resistant  
324 tuberculosis: An update on disease burden, diagnosis and treatment. *Respirology*.  
325 2018;23(7):656-73.
- 326 14. Sanchez-Padilla E, Merker M, Beckert P, Jochims F, Dlamini T, Kahn P, et al. Detection of  
327 Drug-Resistant Tuberculosis by Xpert MTB/RIF in Swaziland. *N Engl J Med*. 19 mars  
328 2015;372(12):1181-2.
- 329 15. Cole ST, Brosch R, Parkhill J, Garnier T, Churcher C, Harris D, et al. Deciphering the  
330 biology of *Mycobacterium tuberculosis* from the complete genome sequence. *Nature*.  
331 11 juin 1998;393(6685):537-44.
- 332 16. Shea J, Halse TA, Lapierre P, Shudt M, Kohlerschmidt D, Van Roey P, et al.  
333 Comprehensive Whole-Genome Sequencing and Reporting of Drug Resistance Profiles  
334 on Clinical Cases of *Mycobacterium tuberculosis* in New York State. Land GA, éditeur. *J*  
335 *Clin Microbiol*. juin 2017;55(6):1871-82.
- 336 17. Lee RS, Pai M. Real-Time Sequencing of *Mycobacterium tuberculosis*: Are We There  
337 Yet? Tang YW, éditeur. *J Clin Microbiol*. mai 2017;55(5):1249-54.
- 338 18. Walker TM, Kohl TA, Omar SV, Hedge J, Del Ojo Elias C, Bradley P, et al. Whole-genome  
339 sequencing for prediction of *Mycobacterium tuberculosis* drug susceptibility and  
340 resistance: a retrospective cohort study. *Lancet Infect Dis*. oct 2015;15(10):1193-202.
- 341 19. Organisation mondiale de la santé. 2008. Molecular line probe assays for rapid screening  
342 of patients at risk of multidrug-resistant tuberculosis. WHO [Internet]. [cité 26 août  
343 2020]. Disponible sur:  
344 [https://www.who.int/tb/features\\_archive/policy\\_statement.pdf?ua=1](https://www.who.int/tb/features_archive/policy_statement.pdf?ua=1)
- 345 20. Coll F, McNerney R, Preston MD, Guerra-Assunção JA, Warry A, Hill-Cawthorne G, et al.  
346 Rapid determination of anti-tuberculosis drug resistance from whole-genome  
347 sequences. *Genome Med*. déc 2015;7(1):51.
- 348 21. Feuerriegel S, Schleusener V, Beckert P, Kohl TA, Miotto P, Cirillo DM, et al. PhyResSE: a  
349 Web Tool Delineating *Mycobacterium tuberculosis* Antibiotic Resistance and Lineage  
350 from Whole-Genome Sequencing Data. Carroll KC, éditeur. *J Clin Microbiol*. juin  
351 2015;53(6):1908-14.
- 352 22. Kohl TA, Utpatel C, Schleusener V, De Filippo MR, Beckert P, Cirillo DM, et al. MTBseq: a  
353 comprehensive pipeline for whole genome sequence analysis of *Mycobacterium*  
354 *tuberculosis* complex isolates. *PeerJ*. 13 nov 2018;6:e5895.
- 355 23. Bradley P, Gordon NC, Walker TM, Dunn L, Heys S, Huang B, et al. Rapid antibiotic-  
356 resistance predictions from genome sequence data for *Staphylococcus aureus* and  
357 *Mycobacterium tuberculosis*. *Nat Commun*. 21 déc 2015;6(1):10063.
- 358 24. Steiner A, Stucki D, Coscolla M, Borrell S, Gagneux S. KvarQ: targeted and direct variant  
359 calling from fastq reads of bacterial genomes. *BMC Genomics*. 9 oct 2014;15(1):881.

- 360 25. Billard-Pomares T, Bleibtreu A, Walewski V, Dziri S, Barbat A, Zahar JR, et al. Proposition  
361 of a safe *Mycobacterium tuberculosis* complex denaturation method that does not  
362 compromise the integrity of DNA for whole-genome sequencing. *Tuberculosis*. juill  
363 2019;117:62-4.
- 364 26. Satta G, Atzeni A, McHugh TD. *Mycobacterium tuberculosis* and whole genome  
365 sequencing: a practical guide and online tools available for the clinical microbiologist.  
366 *Clinical Microbiology and Infection*. 1 févr 2017;23(2):69-72.
- 367 27. Hunt M, Bradley P, Lapierre SG, Heys S, Thomsit M, Hall MB, et al. Antibiotic resistance  
368 prediction for *Mycobacterium tuberculosis* from genome sequence data with Mykrobe.  
369 *Wellcome Open Res*. 2 déc 2019;4:191.
- 370 28. Schleusener V, Köser CU, Beckert P, Niemann S, Feuerriegel S. *Mycobacterium*  
371 *tuberculosis* resistance prediction and lineage classification from genome sequencing:  
372 comparison of automated analysis tools. *Sci Rep*. juin 2017;7(1):46327.
- 373 29. Papaventsis D, Casali N, Kontsevaya I, Drobniowski F, Cirillo DM, Nikolayevskyy V.  
374 Whole genome sequencing of *Mycobacterium tuberculosis* for detection of drug  
375 resistance: a systematic review. *Clinical Microbiology and Infection*. févr  
376 2017;23(2):61-8.
- 377 30. Bradley P, Den Bakker HC, Rocha EPC, McVean G, Iqbal Z. Ultra-fast search of all  
378 deposited bacterial and viral genomic data. *Nat Biotechnol*. févr 2019;37(2):152-9.
- 379 31. Bradley P, Bakker HCD, Rocha EPC, McVean G, Iqbal Z. Real-time search of all bacterial  
380 and viral genomic data [Internet]. *bioRxiv*; 2017 [cité 2 avr 2022]. p. 234955. Disponible  
381 sur: <https://www.biorxiv.org/content/10.1101/234955v1>
- 382 32. van Beek J, Haanperä M, Smit PW, Mentula S, Soini H. Evaluation of whole genome  
383 sequencing and software tools for drug susceptibility testing of *Mycobacterium*  
384 *tuberculosis*. *Clinical Microbiology and Infection*. janv 2019;25(1):82-6.
- 385 33. Quan TP, Bawa Z, Foster D, Walker T, del Ojo Elias C, Rathod P, et al. Evaluation of  
386 Whole-Genome Sequencing for Mycobacterial Species Identification and Drug  
387 Susceptibility Testing in a Clinical Setting: a Large-Scale Prospective Assessment of  
388 Performance against Line Probe Assays and Phenotyping. *Diekema DJ, éditeur. J Clin*  
389 *Microbiol*. 22 nov 2017;56(2):e01480-17.

390

391

392 Table 1. Sensitivity and Specificity of PhyResSE and Mykrobe tools compared to the phenotypic  
393 method.

| Antibiotics                                      | DST |     | PhyResSE |        | Mykrobe |        |
|--------------------------------------------------|-----|-----|----------|--------|---------|--------|
|                                                  | R   | S   | Se (%)   | Sp (%) | Se (%)  | Sp (%) |
| Rifampicin ( <i>rpoB</i> )                       | 5   | 222 | 100      | 100    | 80      | 99     |
| Isoniazid ( <i>fabG1, katG</i> )                 | 18  | 209 | 83       | 100    | 83      | 100    |
| Ethambutol ( <i>embA</i> )                       | 1   | 226 | 100      | 99     | 100     | 100    |
| Pyrazinamid ( <i>pncA</i> )                      | 12  | 215 | 67       | 99     | 67      | 100    |
| First line anti-TB drugs<br>(RMP, INH, EMB, PZA) | 30  | 197 | 72       | 97     | 70      | 98     |

394 DST, Drug susceptibility testing; R, Number of resistant strains; S, number of susceptible  
395 strains; RIF, rifampicin; INH, isoniazid; EMB, ethambutol; PZA, pyrazinamide; Se, Sensitivity;  
396 Sp, Specificity; NA, not applicable.

397

398

399 Table 2. Phenotype-genotype mismatch identified by the PhyResSE tool.

| Drug | Phenotypically resistant |                       | Phenotypically sensitive |                       |                                                                |
|------|--------------------------|-----------------------|--------------------------|-----------------------|----------------------------------------------------------------|
|      | Genetically resistant    | Genetically sensitive | Genetically sensitive    | Genetically resistant | Non-detected resistance                                        |
| RIF  | 5                        | 0                     | 222                      | 0                     | NA                                                             |
| INH  | 15                       | 3                     | 209                      | 0                     | NA                                                             |
| EMB  | 1                        | 0                     | 224                      | 2                     | One strain <i>embA</i> (D4N)<br>One strain <i>embB</i> (G406A) |
| PZA  | 8                        | 4                     | 212                      | 3                     | <i>pncA</i> for the 3 strains (T87M)                           |

400 RIF, rifampicin; INH, isoniazid; EMB, ethambutol; PZA, pyrazinamide; NA, not applicable.

401

402

403

404

405

406

407

408 Table 3. Phenotype-genotype mismatch identified by the Mykrobe tool.

| Drug | Phenotypically resistant |                       | Phenotypically sensitive |                       |                                         |
|------|--------------------------|-----------------------|--------------------------|-----------------------|-----------------------------------------|
|      | Genetically resistant    | Genetically sensitive | Genetically sensitive    | Genetically resistant | Non-detected resistance                 |
| RIF  | 4                        | 1                     | 220                      | 2                     | <i>rpoB</i> for the two strains (D545E) |
| INH  | 15                       | 3                     | 209                      | 0                     | NA                                      |
| EMB  | 1                        | 0                     | 225                      | 1                     | <i>embB</i> (G406A)                     |
| PZA  | 8                        | 4                     | 215                      | 0                     | NA                                      |

409 RIF, rifampicin; INH, isoniazid; EMB, ethambutol; PZA, pyrazinamide; NA, not applicable.

410

411



412 Table 4. Distribution of the different lineages of *Mycobacterium tuberculosis complex* strains found by the two  
413 bioinformatics tools PhyResSE and Mykrobe.

| <b>Lineage</b>                                            | <b>PhyResSE</b> | <b>Mykrobe</b> |
|-----------------------------------------------------------|-----------------|----------------|
| <i>Mtb</i> Euro-American (lineage 4)                      | 155 (68%)       | 154 (67,8%)    |
| <i>Mtb</i> East African Indian (lineage 3)                | 13 (5,7%)       | 14 (6,1%)      |
| <i>Mtb</i> Indo-oceanic (lineage 1)                       | 31 (13,6%)      | 31 (13,6%)     |
| <i>Mtb</i> East Asian (lineage 2)                         | 12 (5,3%)       | 12 (5,3%)      |
| <i>Mycobacterium africanum</i> West African 2 (lineage 6) | 6 (2,6%)        | 6 (2,6%)       |
| <i>Mycobacterium bovis</i>                                | 6 (2,6%)        | 6 (2,6%)       |
| <i>Mycobacterium africanum</i> West African 1 (lineage 5) | 4 (1,7%)        | 4 (1,7%)       |
| Total                                                     | 227             | 227            |

414 *Mtb*, *Mycobacterium tuberculosis*

415
